# Supplementary material for: Local sources versus long-range transport of organic contaminants in the Arctic: future developments related to climate change
Source: Royal Society of Chemistry journal article supplement (doi:10.1039/d4va00240g), 2025-01-01
Supplement: d4va00240g1.pdf [file d4va00240g1.pdf]

## Supplemental information

### **Local sources versus long-range transport of organic contaminants in the Arctic: Future developments related to climate change**

Derek C.G. Muir, Maria J. Gunnarsdóttir, Krystyna Koziol, Frank A. von Hippel, Danuta Szumińska, Nicoletta Ademollo, Simonetta Corsolini, Amila De Silva, Geir Gabrielsen, Roland Kallenborn, Żaneta Polkowska, Eva Krüemmel, Katrin Vorkamp

**Table S1.** The range of concentrations of selected POPs in the various glacier related environmental media in the Arctic. Data are based on the review by <sup>1</sup> except where noted with updated literature, including PFAS, published until 31st May 2023<sup>1</sup>.

| POPs <sup>1</sup>    | Snow cover, 2000-2021<br>[pg L <sup>-1</sup> ]                                                                                                                      | Ref                                                           | Glacier ice, layers<br>corresponding to years within<br>the range 2000 – 2019 [pg L <sup>-1</sup> ]                                                                               | Ref                                                           | Glacial runoff (2000 – 2017)<br>[pg L <sup>-1</sup> ]                                                                                        | Ref                              | Proglacial lake sediments<br>(2000 – 2015) [ng g <sup>-1</sup> ] | Ref                                             |
|----------------------|---------------------------------------------------------------------------------------------------------------------------------------------------------------------|---------------------------------------------------------------|-----------------------------------------------------------------------------------------------------------------------------------------------------------------------------------|---------------------------------------------------------------|----------------------------------------------------------------------------------------------------------------------------------------------|----------------------------------|------------------------------------------------------------------|-------------------------------------------------|
| <b>ΣPAHs</b>         | 124 - 183<br><LOD – 10.6·10 <sup>3</sup><br>2.6·10 <sup>3</sup> – 0.299·10 <sup>6</sup><br><LOD – 3.78·10 <sup>6</sup><br>7.7·10 <sup>3</sup> – 5.2·10 <sup>6</sup> | <b>17</b><br><b>16</b><br><b>20</b><br><b>19</b><br><b>18</b> | 3.13 · 10 <sup>3</sup> – 21.1·10 <sup>3</sup><br>598 – 2.37·10 <sup>3</sup><br><LOD – 53·10 <sup>3</sup><br>2.3·10 <sup>3</sup> – 103·10 <sup>3</sup><br>35 – 660·10 <sup>3</sup> | <b>22</b><br><b>23</b><br><b>24</b><br><b>21</b><br><b>25</b> | 0.243·10 <sup>6</sup> – 3.90·10 <sup>6</sup>                                                                                                 | <b>26</b>                        | 1 – 429<br><LOD – 640<br>11 – 1100                               | <b>28</b><br><b>27</b><br><b>14</b>             |
| <b>ΣPCBs</b>         | <LOD – 869<br>116 – 2000<br>45 - 2537                                                                                                                               | <b>19</b><br><b>12</b><br><b>32</b>                           | 5.8 – 19<br>458 – 844                                                                                                                                                             | <b>29</b><br><b>30</b>                                        | ΣPCBs (2012) = 1.3 – 7.6<br>ΣPCBs <sub>12</sub> (2018) = 2.8 pg L <sup>-1</sup> (D)<br>ΣPCBs <sub>14</sub> (2018) = 21 pg g <sup>-1</sup> dw | <b>2</b><br><b>3</b><br><b>3</b> | 0.9 – 5.6<br>1.25 – 13.52<br>0.007-0.29<br>0.06 – 21             | <b>28</b><br><b>27</b><br><b>1</b><br><b>14</b> |
| <b>Fragrances</b>    | 7-10                                                                                                                                                                | <b>20</b>                                                     |                                                                                                                                                                                   |                                                               |                                                                                                                                              |                                  |                                                                  |                                                 |
| <b>α-endosulfan</b>  | 11.6 – 29.4<br><LOD – 30                                                                                                                                            | <b>9</b><br><b>8</b>                                          | 6.8<br>10700                                                                                                                                                                      | <b>11</b><br><b>10</b>                                        | <i>no data</i>                                                                                                                               |                                  | <0.01                                                            | <b>1</b>                                        |
| <b>α-HCH</b>         | 6.50 – 44.6<br>17.1 – 382<br><LOD - 1090                                                                                                                            | <b>9</b><br><b>12</b><br><b>32</b>                            | 150<br>295<br>1100                                                                                                                                                                | <b>13</b><br><b>11</b><br><b>10</b>                           | 190 – 270                                                                                                                                    | <b>13</b>                        | 0.01 – 0.27                                                      | <b>1</b>                                        |
| <b>γ-HCH</b>         | 12.2 – 30.4<br><LOD - 518<br>265 – 4390                                                                                                                             | <b>9</b><br><b>32</b><br><b>12</b>                            | 150<br>369<br>7700                                                                                                                                                                | <b>13</b><br><b>11</b><br><b>10</b>                           | 320 – 360                                                                                                                                    | <b>13</b>                        | 0.002-0.09                                                       | <b>1</b>                                        |
| <b>ΣHCHs</b>         | 17.3 – 1126                                                                                                                                                         | <b>32</b>                                                     | <i>no data</i>                                                                                                                                                                    |                                                               | 1.2 – 49.7                                                                                                                                   | <b>2</b>                         | 0.21– 7.0<br>0.014 – 0.36                                        | <b>14</b><br><b>1</b>                           |
| <b>HCB</b>           | 19.7 – 24.0<br>9.51 – 62.5                                                                                                                                          | <b>9</b><br><b>12</b>                                         | <i>no data</i>                                                                                                                                                                    |                                                               | 4.4 – 13.3 (2012)                                                                                                                            | <b>2</b>                         | 0.014-1.24                                                       | <b>1</b>                                        |
| <b>4,4'-DDT</b>      | <LOD – 593                                                                                                                                                          | <b>32</b>                                                     | <LOD<br>2.93<br>510                                                                                                                                                               | <b>10</b><br><b>11</b><br><b>13</b>                           | 470 – 580                                                                                                                                    | <b>13</b>                        | <i>no data</i>                                                   |                                                 |
| <b>ΣDDTs</b>         | 1.73 – 8.5<br>9.54 – 5572                                                                                                                                           | <b>12</b><br><b>32</b>                                        | <i>no data</i>                                                                                                                                                                    |                                                               | 0.0 – 7.1 (2012)                                                                                                                             | <b>2</b>                         | <0.001 – 0.01<br>0.12 – 5.9                                      | <b>1</b><br><b>14</b>                           |
| <b>ΣPBDEs</b>        | 838 - 106 · 10 <sup>3</sup>                                                                                                                                         | <b>31</b>                                                     | 340 – 7070                                                                                                                                                                        | <b>15</b>                                                     | <i>no data</i>                                                                                                                               |                                  | 0.024 – 0.97                                                     | <b>14</b>                                       |
| <b>PFAs(C6-C14)</b>  | <i>no data</i>                                                                                                                                                      |                                                               | 325 – 1030<br>266 – 1730                                                                                                                                                          | <b>4</b><br><b>5</b>                                          | 230 – 8640                                                                                                                                   | <b>7</b>                         | 0.003 – 0.113                                                    | <b>6</b>                                        |
| <b>PFAs (C4-C12)</b> | <i>no data</i>                                                                                                                                                      |                                                               | <1 – 226<br>12 – 404                                                                                                                                                              | <b>4</b><br><b>5</b>                                          | <10 – 506                                                                                                                                    | <b>7</b>                         | 0.003 – 0.038                                                    | <b>6</b>                                        |

<sup>1</sup>The time period for sampling is 2000-2023 except for PAHs where all reports are included due to the limited number of studies. The data generally represent ranges of concentrations reported for multiple sites within a given region.

#### References:

- [1] Muir et al. Unpublished data for Lake Hazen sediment core (0-10 cm, sampled 2013)
- [2] McGovern et al.<sup>2</sup> – samples collected in 2012. Dissolved concentrations.
- [3] Johansen et al.<sup>3</sup>- samples collected in 2018.\*\* new data for comparison, from Ebbaelva river only, D = dissolved phase (from passive samplers), P = particulate phase (from sediment traps).
- [4] Hartz et al.<sup>4</sup> - core from the Lomonosovfonna ice cap, Svalbard
- [5] Pickard et al. <sup>5</sup> - core from the Devon Ice cap, Devon Island, Nunavut
- [6] MacInnis et al <sup>6</sup> - Lake Hazen sediment core (0-10 cm, sampled 2011)
- [7] MacInnis et al <sup>7</sup> – glacial rivers, Lake Hazen watershed, sampled summer 2012, 2013 and 2014
- [8] Zhang et al..<sup>8</sup> - Devon Ice Cap, 2008
- [9] Hermanson et al.<sup>9</sup> - Svalbard glaciers, 2013-2014
- [10] Hermanson et al.<sup>10</sup> - Austfonna, Svalbard, 1943-1998 ice core layers. Maximum concentrations
- [11] Ruggirello et al.<sup>11</sup> - Holtedahlfonna, Svalbard, 1953-2005 ice core layers
- [12] Herbert et al. <sup>12</sup> - Tromsø on Storsteinen Mt., 2003
- [13] Miner et al.<sup>13</sup> - Jarvis Glacier & Creek, Alaska, 2017
- [14] Jiao et al.<sup>14</sup>- Svalbard/Ny – Ålesund, 2005
- [15] Hermanson et al.<sup>15</sup> - Svalbard, Holtedahlfonna, 1953-2005
- [16] Masclet et al.<sup>16</sup>- Greenland, 1993
- [17] Currie et al.<sup>17</sup> - Greenland, Summit, 1996
- [18] Abramova et al.<sup>18</sup>- Spitsbergen, 2012 - 2014
- [19] Koziol et al.<sup>19</sup> - Foxfonna, 2014
- [20] Vecchiato et al.<sup>20</sup>- Ny-Ålesund, 2017; fragrances: sum of benzyl Salicylate, amyl Salicylate, hexyl Salicylate, Peonile
- [21] Kawamura et al. <sup>21</sup> - Site-J, Greenland, 1500-1982
- [22] Slater et al.<sup>22</sup> - Summit, Greenland
- [23] Jaffrezo et al.<sup>23</sup> - Summit, Greenland, 1988 - 1991
- [24] Vehviläinen et al.<sup>24</sup> - Spitsbergen, Lomonosovfonna, 1476-1989
- [25] Peters et al.<sup>25</sup> - Agassiz Ice Cap, Ellesmere Island, Canada, 1963 – 1993
- [26] Kosek et al.<sup>26,27</sup>- Svalbard/Revelva, 2015–2016
- [27] Rose et al.<sup>28</sup> - Svalbard, 1995
- [28] Sapota et al.<sup>29</sup> - North Spitsbergen, 2005
- [29] Garmash et al.<sup>30</sup> - Lomonosovfonna, 1957- 2010
- [30] Hermanson et al.<sup>31</sup> - four glacier sites on Svalbard, 2013-2014
- [31] Meyer et al.<sup>32</sup> - Devon Ice Cap snowpits
- [32] Pawlak et al.<sup>33</sup> - Hans glacier (2019), Werenskiöldbreen, Ariebreen, Vestre Torrellbreen and Profilbreen (2021)

**Table S2.** Literature information about PAHs in the Arctic permafrost environment (peatlands, soils, sediments, water).

| Media          | Location/date of sample collection                                                                    | Total PAHs (unless noted)                                                                                                                                                | References                         | Sources of PAH and conclusions                                                                                                                                                                                                                                                                                                                                                                                                                                  |
|----------------|-------------------------------------------------------------------------------------------------------|--------------------------------------------------------------------------------------------------------------------------------------------------------------------------|------------------------------------|-----------------------------------------------------------------------------------------------------------------------------------------------------------------------------------------------------------------------------------------------------------------------------------------------------------------------------------------------------------------------------------------------------------------------------------------------------------------|
| <b>RUSSIA</b>  |                                                                                                       |                                                                                                                                                                          |                                    |                                                                                                                                                                                                                                                                                                                                                                                                                                                                 |
| Lake sediment  | Sediment core (borehole 1D-14)–38.2 m<br><br>Ivashkina lagoon on the Bykovskii Peninsula (Laptev Sea) | 2,4-517 ng g <sup>-1</sup>                                                                                                                                               | <sup>34</sup>                      | Varied PAHs content in the particular layers indicates a time-varying deposition, 300-500 ng g <sup>-1</sup> at a depth of 30m - archival record of the warmer phase of the Pleistocene, pyrogenic genesis.<br><br>Pyrogenic and petrogenic; grass and forest fires, coal burning, biogenic (peat/sediment diagenesis), volcanic rocks, precambrian schists, alluvial sands                                                                                     |
| River sediment | Rivers flowing into the Arctic Ocean (08/2005)                                                        | Ob: 23.8 ng g <sup>-1</sup><br>Yenisey: 129 ng g <sup>-1</sup><br>Lena: 79.6 ng g <sup>-1</sup><br>Indigirka: 84.6 ng g <sup>-1</sup><br>Kolyma: 91.1 ng g <sup>-1</sup> | <sup>35</sup>                      | Black carbon content weighted by the river runoff, amount to about 20% from vegetation/biofuel burning and 80% from 14C-extinct sources such as fossil fuel combustion and relict BC in uplifted source.<br>PAHs may originate from forest and grass burning in the past.                                                                                                                                                                                       |
| Soils          | Islands and capes at the shore of the Kara Sea and Laptev Sea                                         | 37-1400 ng g <sup>-1</sup>                                                                                                                                               | <sup>36</sup>                      | Soils contamination due to station activity. Pyrogenic and petrogenic; diesel fuel usage – station activity, biogenic (peat/sediment diagenesis)                                                                                                                                                                                                                                                                                                                |
| Soils          | Komi Republic, Vorkuta district (2009)                                                                | All soils horizons:<br>2.3-380 ng g <sup>-1</sup><br>Organic horizons<br>91.2-240.3 ng g <sup>-1</sup>                                                                   | <sup>37</sup>                      | Pyrogenic and petrogenic; atmospheric, biogenic (peat/sediment diagenesis)                                                                                                                                                                                                                                                                                                                                                                                      |
| Soils          | Komi Republic,<br><br>Vorkuta district (2014)<br><br>Inta (2015)                                      | 160-8500 ng g <sup>-1</sup><br><br>58-2800 ng g <sup>-1</sup>                                                                                                            | <sup>38</sup><br><br><sup>39</sup> | The accumulation of PAHs in the profiles of permafrost-affected peat mounds is related to certain groups of plant residues produced in the Atlantic climatic optimum of the Holocene. Pyrogenic and petrogenic; atmospheric, biogenic (peat/sediment diagenesis)<br><br>PAHs composition at the boundary of seasonally thawed layers and permafrost in peatlands can be used as an indicator of the response of permafrost to climate change at high latitudes. |
| Soils          | Organic horizon Komi Republic, Vorkuta district (2009)                                                | 249.8-908.5 ng g <sup>-1</sup> (mean values)<br>471 - 1493 µg m <sup>-2</sup>                                                                                            | <sup>40</sup><br><br><sup>41</sup> | Accumulation of PAHs from local atmospheric sources, accumulation in both active vegetation and peat, bioaccumulation, and the possibility of using PAHs as an indicator of environmental changes. Pyrogenic and petrogenic; atmospheric – coal combustion,                                                                                                                                                                                                     |

|                                                                        |                                                                                                                     |                                                                  |              |                                                                                                                                                                                                                                                                                                                                                                                                                                                                                                                                                                                                                                                                                                              |
|------------------------------------------------------------------------|---------------------------------------------------------------------------------------------------------------------|------------------------------------------------------------------|--------------|--------------------------------------------------------------------------------------------------------------------------------------------------------------------------------------------------------------------------------------------------------------------------------------------------------------------------------------------------------------------------------------------------------------------------------------------------------------------------------------------------------------------------------------------------------------------------------------------------------------------------------------------------------------------------------------------------------------|
|                                                                        |                                                                                                                     |                                                                  |              | biogenic (peat/sediment diagenesis)                                                                                                                                                                                                                                                                                                                                                                                                                                                                                                                                                                                                                                                                          |
| Peatlands                                                              | Permafrost peatlands. Pechora basin, Pechora and lower Ob and Pur basins<br>The south border of permafrost expands. | 150–3700 ng g <sup>-1</sup><br><br>112 - 3673 ng g <sup>-1</sup> | 42<br><br>43 | Quantitative and qualitative differentiation (3-4 rings and 5-6) on various levels studied. Pyrogenic and petrogenic; fires, biogenic (peat/sediment diagenesis) Heavy 5-6 rings in deeper layers are of natural origin in melting permafrost, may be an indicator of the preservation of organic matter from the warm Holocene periods. The pyrogenic PAHs found form evidence of past fires.<br><br>In the Eastern European peat plateaus, in particular, 6-nuclear benzo[ghi]perylene (1021 ± 707 ng g <sup>-1</sup> ) occurred, whereas in West Siberian permafrost peatlands, light PAHs were dominating, mostly naphthalene and phenanthrene (211 ± 87 and 64 ± 25 ng g <sup>-1</sup> , respectively). |
| Soils                                                                  | Yamal-Nenets autonomous region (65 – 72°N, 64 – 80 °E) (07/2017)                                                    | 78.1 – 131 ng g <sup>-1</sup>                                    | 44           | Chromium mining area and background site. 16 unsubstituted PAH. The permafrost is semi-permeable to PAHs (low migration in profile), however, accumulation of 5 and 6-ring PAHs was found at the bottom of the active layer. The authors consider it to be PAHs migration, or some older source from past fires.                                                                                                                                                                                                                                                                                                                                                                                             |
| Soils                                                                  | Tazovsky Peninsula (North-West Siberia); Yakutsk (Central Yakutia); Kolyma Lowland (North Yakutia)<br><br>(2019)    | 36.0 - 331.4 ng g <sup>-1</sup>                                  | 45           | PAHs are strongly connected with the origin of the material and its total organic carbon content. The sum of high-molecular PAHs of anthropogenic origin were present in the samples of buried organo-mineral material and reached 5.7% of the total PAHs (background unaffected soils contain only 0.2-0.4% of “heavy” PAHs). This fact strengthens the idea of the possible long-term conservation of these pollutants in frozen deposits and buried soils.                                                                                                                                                                                                                                                |
| <b>SVALBARD and NORWAY [limited to freshwater sediments and soils]</b> |                                                                                                                     |                                                                  |              |                                                                                                                                                                                                                                                                                                                                                                                                                                                                                                                                                                                                                                                                                                              |
| Soils                                                                  | Ny-Ålesund (07-08/2007)<br>78° 55'N 11° 52'E to 78° 51'N 12° 33'E                                                   | 37-324 ng g <sup>-1</sup> d.w.                                   | 46           | 16 unsubstituted PAHs analysed by GC-MS                                                                                                                                                                                                                                                                                                                                                                                                                                                                                                                                                                                                                                                                      |
| Freshwater & marine sediment                                           | Sediment cores Bellsund (08/2002, 06/2004)                                                                          | Lake: 2610 ng g <sup>-1</sup><br>Marine: 3076 ng g <sup>-1</sup> | 47           |                                                                                                                                                                                                                                                                                                                                                                                                                                                                                                                                                                                                                                                                                                              |
| Freshwater                                                             | Hornsund, Fuglebekken catchment (07-09, 2011) stream outflow, 77.006 °N, 15.553 °E                                  | ΣPAHs = 3.3 ng L <sup>-1</sup><br>ΣPCBs = 4.2 ng L <sup>-1</sup> | 48           | 12 unsubstituted PAHs analysed by GC-MS, 7 OCB congeners (CB 28, 52, 101, 118, 138, 153, 180)                                                                                                                                                                                                                                                                                                                                                                                                                                                                                                                                                                                                                |
| Freshwater                                                             | Hornsund, Revelva catchment (07-                                                                                    | ΣPAHs = up to 3141 ng                                            | 26           | Atmospheric                                                                                                                                                                                                                                                                                                                                                                                                                                                                                                                                                                                                                                                                                                  |

|                                      |                                                                                                    |                                                                                                            |    |                                                                                                                                                                                                                                        |
|--------------------------------------|----------------------------------------------------------------------------------------------------|------------------------------------------------------------------------------------------------------------|----|----------------------------------------------------------------------------------------------------------------------------------------------------------------------------------------------------------------------------------------|
|                                      | 08,2015)                                                                                           | L <sup>-1</sup><br>Naphthalene 76.1–1823<br>ng L <sup>-1</sup><br>Anthracene 21–1450 ng<br>L <sup>-1</sup> |    |                                                                                                                                                                                                                                        |
| Freshwater                           | Hornsund, Fuglebekken catchment<br>(06-08, 2010-2013)                                              | 13.3–6797 ng·L <sup>-1</sup>                                                                               | 49 | Petrogenic and pyrogenic, including deposition from volcanic activity in Iceland (Eyjafjallajökull volcano 2010)                                                                                                                       |
| Freshwater                           | Hornsund, Revelva catchment (06-08, 2016)                                                          | Naphthalene 87–611 ng<br>L <sup>-1</sup><br>Anthracene 8.9–1871 ng<br>L <sup>-1</sup>                      | 27 | Snowmelt (secondary source; characteristic elution pattern observed);5-6 ring PAHs later in the season: proposed secondary source due to permafrost thaw                                                                               |
| Freshwater & marine sediment         | Sediment cores (lake and seashore) Norwegian Coast Nordland, Troms and Finnmark (08/2002, 06/2004) | Lake: 217-7045 ng g <sup>-1</sup><br>Marine: 82-636 ng g <sup>-1</sup>                                     | 47 |                                                                                                                                                                                                                                        |
| <b>Canada and USA (Alaska)</b>       |                                                                                                    |                                                                                                            |    |                                                                                                                                                                                                                                        |
| Coastal peat soils                   | 70° 05.5'N, 152°16.8' W to 70°47.3'N 152° 16.8'W                                                   | 40 - 700 ng g <sup>-1</sup>                                                                                | 50 | Samples of peat from exposed shoreline cliffs. ΣPAH = two- to five-ring PAH (N + F + P + D + 4-,5-PAH) includes those of petrogenic, and diagenetic origin eg perylene                                                                 |
| Coastal river sediments              | 70° 04.9'N, 143°45' W to 70° 23.0'N, 150°30' W                                                     | 40 - 640 ng g <sup>-1</sup>                                                                                | 50 | Sediment from mouths of the Canning, Sagavanirktok, Kuparuk and Colville Rivers. ΣPAH = two- to five-ring polynuclear aromatic hydrocarbons (N + F + P + D + 4-,5-PAH) includes those of petrogenic, and diagenetic origin eg perylene |
| Coastal peat soils                   | 69° 05.2'N, 137° 55' W to 69° 25.0'N, 133° 08'W                                                    | 63±63 ng g <sup>-1</sup><br>phenanthrene/chrysene<br>100±110 ng g <sup>-1</sup> 4-6 ring PAHs              | 51 | 21 PAHs measured from naphthalene to benzo(ghi)perylene                                                                                                                                                                                |
| Mackenzie River near shore sediments | 69° 10.2'N 135° 01.6' W to 68° 53.4'N 135° 01.8'W                                                  | 340±90 ng g <sup>-1</sup><br>phenanthrene/chrysene<br>400±100 ng g <sup>-1</sup> 4-6 ring PAHs             | 51 | 21 PAHs measured from naphthalene to benzo(ghi)perylene                                                                                                                                                                                |
| Coastal peat soils                   | 70° 30'N 151° 00' W to 70° 00'N 147° 30'W                                                          | 121 - 737 ng g <sup>-1</sup>                                                                               | 52 | Peat from mouths of 4 North Slope rivers (4 samples). 41 target parent PAH and alkyl-PAH isomer groups                                                                                                                                 |
| River sediment                       | Rivers flowing into the Bering Sea and Arctic Ocean (08/2005)                                      | Yukon 85 ng g <sup>-1</sup><br>Mackenzie 454 ng g <sup>-1</sup>                                            | 35 | 14 unsubstituted PAHs + methyl- and dimethyl phenanthrenes, methyl-pyrenes, and retene                                                                                                                                                 |

## References

1. F. Pawlak, K. Koziol and Z. Polkowska, Chemical hazard in glacial melt? The glacial system as a secondary source of POPs (in the Northern Hemisphere). A systematic review, *Science of The Total Environment*, 2021, DOI: <https://doi.org/10.1016/j.scitotenv.2021.145244>, 145244.
2. M. M. McGovern, K. Borgå, E. Heimstad, A. Ruus, G. Christensen and A. Evenset, Small Arctic rivers transport legacy contaminants from thawing catchments to coastal areas in Kongsfjorden, Svalbard, *Environmental Pollution*, 2022, **304**.
3. S. Johansen, A. Poste, I. Allan, A. Evenset and P. Carlsson, Terrestrial inputs govern spatial distribution of polychlorinated biphenyls (PCBs) and hexachlorobenzene (HCB) in an Arctic fjord system (Isfjorden, Svalbard), *Environmental Pollution*, 2021, **281**, 116963.
4. W. F. Hartz, M. K. Björnsdotter, L. W. Y. Yeung, A. Hodson, E. R. Thomas, J. D. Humby, C. Day, I. E. Jogsten, A. Kärrman and R. Kallenborn, Levels and distribution profiles of Per- and Polyfluoroalkyl Substances (PFAS) in a high Arctic Svalbard ice core, *Science of The Total Environment*, 2023, **871**, 161830.
5. H. M. Pickard, A. S. Criscitiello, C. Spencer, M. J. Sharp, D. C. G. Muir, A. O. De Silva and C. J. Young, Continuous non-marine inputs of per- and polyfluoroalkyl substances to the High Arctic: A multi-decadal temporal record, *Atmospheric Chemistry and Physics*, 2018, **18**, 5045-5058.
6. J. J. MacInnis, I. Lehnerr, D. C. G. Muir, R. Quinlan and A. O. De Silva, Characterization of perfluoroalkyl substances in sediment cores from High and Low Arctic lakes in Canada, *Science of the Total Environment*, 2019, **666**, 414-422.
7. J. MacInnis, A. O. De Silva, I. Lehnerr, D. C. G. Muir, K. A. St. Pierre, V. L. St. Louis and C. Spencer, Investigation of perfluoroalkyl substances in proglacial rivers and permafrost seep in a high Arctic watershed, *Environmental Science: Processes & Impacts*, 2022, **24**, 42-51.
8. X. Zhang, T. Meyer, D. C. G. Muir, C. Teixeira, X. Wang and F. Wania, Atmospheric deposition of current use pesticides in the Arctic: Snow core records from the Devon Island Ice Cap, Nunavut, Canada, *Environmental Sciences: Processes and Impacts*, 2013, **15**, 2304-2311.
9. M. H. Hermanson, E. Isaksson, R. Hann, C. Teixeira and D. C. G. Muir, Atmospheric Deposition of Organochlorine Pesticides and Industrial Compounds to Seasonal Surface Snow at Four Glacier Sites on Svalbard, 2013–2014, *Environmental Science & Technology*, 2020, **54**, 9265-9273.
10. M. H. Hermanson, E. Isaksson, C. Teixeira, D. C. G. Muir, K. M. Compher, Y. F. Li, M. Igarashi and K. Kamiyama, Current-use and legacy pesticide history in the Austfonna ice cap, Svalbard, Norway, *Environmental Science and Technology*, 2005, **39**, 8163-8169.
11. R. M. Ruggirello, M. H. Hermanson, E. Isaksson, C. Teixeira, D. C. G. Muir, V. Pohjola, R. Van de Wal and H. Meijer, Current-use and legacy pesticide deposition to ice caps on Svalbard, Norway, *JGR-Atmos.*, 2010, **115**, **D18308**.
12. B. M. J. Herbert, C. J. Halsall, S. Villa, K. C. Jones and R. Kallenborn, Rapid changes in PCB and OC pesticide concentrations in arctic snow, *Environmental Science and Technology*, 2005, **39**, 2998-3005.
13. K. R. Miner, S. Campbell, C. Gerbi, A. Liljedahl, T. Anderson, L. B. Perkins, S. Bernsen, T. Gatesman and K. J. Kreutz, Organochlorine pollutants within a polythermal glacier in the interior Eastern Alaska Range, *Water (Switzerland)*, 2018, **10**.
14. L. Jiao, G. J. Zheng, T. B. Minh, B. Richardson, L. Chen, Y. Zhang, L. W. Yeung, J. C. W. Lam, X. Yang, P. K. S. Lam and M. H. Wong, Persistent toxic substances in remote lake and coastal sediments from Svalbard, Norwegian Arctic: Levels, sources and fluxes, *Environmental Pollution*, 2009, **157**, 1342-1351.
15. M. H. Hermanson, E. Isaksson, S. Forsström, C. Teixeira, D. C. G. Muir, V. Pohjola and R. Van de Wal, Deposition history of brominated flame retardant compounds to an ice core from Holtedahlfonna, Svalbard, Norway, *Environ. Sci. Technol.*, 2010, **44**, 7405-7410.

16. P. Masclet, V. Hoyau, J. L. Jaffrezo and H. Cachier, Polycyclic aromatic hydrocarbon deposition on the ice sheet of Greenland. Part I: Superficial snow, *Atmos. Environ.*, 2000, **34**, 3195-3207.
17. L. A. Currie, J. E. Dibb, G. A. Klouda, B. A. Benner Jr, J. M. Conny, S. R. Biegalski, D. B. Klinedinst, D. R. Cahoon and N. C. Hsu, The pursuit of isotopic and molecular fire tracers in the polar atmosphere and cryosphere, *Radiocarbon*, 1998, **40**, 381-390.
18. A. Abramova, S. Chernianskii, N. Marchenko and E. Terskaya, Distribution of polycyclic aromatic hydrocarbons in snow particulates around Longyearbyen and Barentsburg settlements, Spitsbergen, *Polar Record*, 2016, **52**, 645-659.
19. K. Kozioł, K. Kozak and Ż. Polkowska, Hydrophobic and hydrophilic properties of pollutants as a factor influencing their redistribution during snowpack melt, *Science of The Total Environment*, 2017, **596-597**, 158-168.
20. M. Vecchiato, E. Barbaro, A. Spolaor, F. Burgay, C. Barbante, R. Piazza and A. Gambaro, Fragrances and PAHs in snow and seawater of Ny-Ålesund (Svalbard): Local and long-range contamination, *Environmental Pollution*, 2018, **242**, 1740-1747.
21. K. Kawamura, I. Suzuki, Y. Fuji and O. Watanabe, Ice core record of polycyclic aromatic hydrocarbons over the past 400 years, *Naturwissenschaften*, 1994, **81**, 502-505.
22. J. F. Slater, L. A. Currie, J. E. Dibb and B. A. Benner Jr, Distinguishing the relative contribution of fossil fuel and biomass combustion aerosols deposited at Summit, Greenland through isotopic and molecular characterization of insoluble carbon, *Atmos. Environ.*, 2002, **36**, 4463-4477.
23. J. L. Jaffrezo, P. Masclet, M. P. Clain, H. Wortham, S. Beyne and H. Cachier, Transfer function of polycyclic aromatic hydrocarbons from the atmosphere to the polar ice-I. Determination of atmospheric concentrations at dye 3, Greenland, *Atmospheric Environment Part A, General Topics*, 1993, **27**, 2781-2785.
24. J. Vehviläinen, E. Isaksson and J. C. Moore, A 20th-century record of naphthalene in an ice core from Svalbard, *Annals of Glaciology*, 2002, **35**, 257-260.
25. A. J. Peters, D. J. Gregor, C. F. Teixeira, N. P. Jones and C. Spencer, The recent depositional trend of polycyclic aromatic hydrocarbons and elemental carbon to the Agassiz ice cap, Ellesmere Island, Canada, *Sci. Total Environ.*, 1995, **160-161**, 167-179.
26. K. Kosek, K. Kozak, K. Kozioł, K. Jankowska, S. Chmiel and Z. Polkowska, The interaction between bacterial abundance and selected pollutants concentration levels in an arctic catchment (southwest Spitsbergen, Svalbard), *Science of the Total Environment*, 2018, **622-623**, 913-923.
27. K. Kosek, K. Kozioł, A. Luczkiewicz, K. Jankowska, S. Chmiel and Ż. Polkowska, Environmental characteristics of a tundra river system in Svalbard. Part 2: Chemical stress factors, *Science of The Total Environment*, 2019, **653**, 1585-1596.
28. N. L. Rose, C. L. Rose, J. F. Boyle and P. G. Appleby, Lake-sediment evidence for local and remote sources of atmospherically deposited pollutants on Svalbard, *Journal of Paleolimnology*, 2004, **31**, 499-513.
29. G. Sapota, B. Wajtasik, D. Burska and K. Nowiński, Persistent organic pollutants (PPOs) and polycyclic aromatic hydrocarbons (PAHs) in surface sediments from selected fjords, tidal plains and lakes of the north spitsbergen, *Polish Polar Research*, 2009, **30**, 59-76.
30. O. Garmash, M. H. Hermanson, E. Isaksson, M. Schwikowski, D. Divine, C. Teixeira and D. C. G. Muir, Deposition history of polychlorinated biphenyls to the lomonosovfonna glacier, Svalbard: A 209 congener analysis, *Environmental Science and Technology*, 2013, **47**, 12064-12072.
31. M. H. Hermanson, E. Isaksson, D. Divine, C. Teixeira and D. C. G. Muir, Atmospheric deposition of polychlorinated biphenyls to seasonal surface snow at four glacier sites on Svalbard, 2013–2014, *Chemosphere*, 2020, **243**, 125324.
32. T. Meyer, D. C. G. Muir, C. Teixeria, T. Young and F. Wania, Deposition of brominated diphenyl ethers on the Devon Ice Cap, *Environ. Sci. Technol.*, 2012, **46** 826-833.
33. F. Pawlak, K. Kozioł, M. Frankowski, Nowicki, C. Marlin, A. M. Sulej-Suchomska and Polkowska, Sea spray as a secondary source of chlorinated persistent organic pollutants? -

- Conclusions from a comparison of seven fresh snowfall events in 2019 and 2021, *Science of the Total Environment*, 2023, **891**.
34. A. N. Drozdova, A. A. Vetrov, E. A. Romankevich, N. A. Prokuda, S. V. Sukhoverkhov, S. Y. Bratskaya, V. I. Sergienko, I. P. Semiletov and A. S. Ulyantsev, Polycyclic aromatic hydrocarbons in Holocene–Pleistocene sediments of the Laptev Sea, *Doklady Earth Sciences*, 2016, **468**, 496-499.
  35. M. Elmquist, I. Semiletov, L. Guo and Ö. Gustafsson, Pan-Arctic patterns in black carbon sources and fluvial discharges deduced from radiocarbon and PAH source apportionment markers in estuarine surface sediments, *Global Biogeochemical Cycles*, 2008, **22**.
  36. E. V. Abakumov, V. M. Tomashunas, E. D. Lodygin, D. N. Gabov, V. T. Sokolov, V. A. Krylenkov and I. Y. Kirtsideli, Polycyclic aromatic hydrocarbons in insular and coastal soils of the Russian Arctic, *Eurasian Soil Science*, 2015, **48**, 1300-1305.
  37. D. N. Gabov and V. A. Beznosikov, Polycyclic aromatic hydrocarbons in tundra soils of the Komi Republic, *Eurasian Soil Science*, 2014, **47**, 18-25.
  38. D. N. Gabov, V. A. Beznosikov and E. V. Yakovleva, Accumulation of polycyclic aromatic hydrocarbons in hummocky tundra peatlands under climate change at high latitudes, *Geochemistry International*, 2017, **55**, 737-751.
  39. D. N. Gabov, Y. V. Yakovleva, R. S. Vasilevich, O. L. Kuznetsov and V. A. Beznosikov, Polycyclic Aromatic Hydrocarbons in Peat Mounds of the Permafrost Zone, *Eurasian Soil Science*, 2019, **52**, 1038-1050.
  40. E. V. Yakovleva, D. N. Gabov, V. A. Beznosikov and B. M. Kondratenok, Accumulation of Polycyclic Aromatic Hydrocarbons in Soils and Mosses of Southern Tundra at Different Distances from the Thermal Power Plant, *Eurasian Soil Science*, 2018, **51**, 528-535.
  41. E. V. Yakovleva, V. A. Beznosikov, B. M. Kondratenok and D. N. Gabov, Bioaccumulation of polycyclic aromatic hydrocarbons in the soil-plant systems of the northern-taiga biocenoses, *Eurasian Soil Science*, 2012, **45**, 309-320.
  42. A. Pastukhov, S. Loiko and D. Kaverin, Polycyclic aromatic hydrocarbons in permafrost peatlands, *Scientific Reports*, 2021, **11**, 18878.
  43. A. V. Pastukhov, D. A. Kaverin and D. N. Gabov, Polycyclic aromatic hydrocarbons in cryogenic peat plateaus of northeastern Europe, *Eurasian Soil Science*, 2017, **50**, 805-813.
  44. X. Ji, E. Abakumov, V. Polyako, X. Xie and W. Dongyang, The ecological impact of mineral exploitation in the Russian Arctic: A field-scale study of polycyclic aromatic hydrocarbons (PAHs) in permafrost-affected soils and lichens of the Yamal-Nenets autonomous region, *Environmental Pollution*, 2019, **255**, 113239.
  45. A. Lupachev, P. Danilov, M. Ksenofontova, E. Lodygin, A. Usacheva, P. Kalinin, Y. Tikhonravova and V. Butakov, Polychemical pollution of surface waters and permafrost-affected soils in Central and North Yakutia and in North-West Siberia, *E3S Web Conf.*, 2020, **163**.
  46. Z. Wang, X. Ma, G. Na, Z. Lin, Q. Ding and Z. Yao, Correlations between physicochemical properties of PAHs and their distribution in soil, moss and reindeer dung at Ny-Ålesund of the Arctic, *Environmental Pollution*, 2009, **157**, 3132-3136.
  47. I. Eide, T. Berg, B. Thorvaldsen, G. N. Christensen, V. Savinov and J. Larsen, Polycyclic Aromatic Hydrocarbons in Dated Freshwater and Marine Sediments Along the Norwegian Coast, *Water, Air, & Soil Pollution*, 2011, **218**, 387-398.
  48. Z. Polkowska, K. Cichala-Kamrowska, M. Ruman, K. Koziol, W. E. Krawczyk and J. Namieśnik, Organic pollution in surface waters from the Fuglebekken basin in Svalbard, Norwegian Arctic, *Sensors*, 2011, **11**, 8910-8929.
  49. K. Kozak, M. Ruman, K. Kosek, G. Karasiński, Ł. Stachnik and Z. Polkowska, Impact of volcanic eruptions on the occurrence of PAHs compounds in the aquatic ecosystem of the southern part of West Spitsbergen (Hornsund Fjord, Svalbard), *Water (Switzerland)*, 2017, **9**.
  50. M. S. Steinhauer and P. D. Boehm, The composition and distribution of saturated and aromatic hydrocarbons in nearshore sediments, river sediments, and coastal peat of the Alaskan Beaufort

- sea: Implications for detecting anthropogenic hydrocarbon inputs, *Marine Environmental Research*, 1992, **33**, 223-253.
51. M. B. Yunker, R. W. Macdonald, B. R. Fowler, W. J. Cretney, S. R. Dallimore and F. A. McLaughlin, Geochemistry and fluxes of hydrocarbons to the Beaufort Sea shelf: A multivariate comparison of fluvial inputs and coastal erosion of peat using principal components analysis, *Geochimica et Cosmochimica Acta*, 1991, **55**, 255-273.
  52. J. M. Neff and G. S. Durell, Bioaccumulation of petroleum hydrocarbons in arctic amphipods in the oil development area of the Alaskan beaufort sea, *Integrated Environmental Assessment and Management*, 2012, **8**, 301-319.
